# Supplementary material for: Sequence characteristics, expression and subcellular localization of PtCYP721A57 gene from cytochrome P450 family in Polygala tenuifolia willd
Source: PeerJ. 2024 Oct 18;12:e18089. doi: 10.7717/peerj.18089 (PMC11493065; doi:10.7717/peerj.18089)
Supplement: Supplemental Information 1 [file peerj-12-18089-s001.xls]

## Sheet: The expression of different tis
Sample Name	Target Name	Cт	Qrt-PCR	xylem	Root	cortex
X	721A57	26.1185		1.11501	2.02156	3.27732
X	721A57	26.2927		0.848126	2.21437	3.29971
X	721A57	25.8915		1.05745	2.06873	3.03555
R	721A57	23.3454	Content	xylem	root	cortex
R	721A57	23.4773		9.68042	13.9843	14.0547
R	721A57	23.3149		9.50821	12.917	14.2882
T	721A57	30.1512			12.7783
T	721A57	30.6577
T	721A57	30.2453

## Sheet: Gene expression analysis
	CK			CHT			ABA
0	0.91288	0.997695	1.09796	0.91288	0.997695	1.09796	0.91288	0.997695	1.09796
6	0.266346	0.27991	0.286104	0.967502	1.03238	1.04318	0.0657639	0.0877133	0.120069
12	0.661099	0.730196	0.656443	0.0237119	0.0244842	0.020725	0.0882516	0.0952567	0.171879
24	0.787878	0.834462	0.819422	0.777538	0.727997	0.757885	0.546005	0.440419	0.436793
48	1.07506	1.093	1.25118	2.9569	2.86432	2.72353	1.57737	1.85255	1.8215
	CK			NaCl			PEG
0	0.91288	0.997695	1.09796	0.91288	0.997695	1.09796	0.91288	0.997695	1.09796
6	0.266346	0.27991	0.286104	3.13855	3.22084	3.14499	0.973651	0.992584	1.03474
12	0.661099	0.730196	0.656443	2.43794	2.40383	2.43794	1.09905	1.003	0.907159
24	0.787878	0.834462	0.819422	1.85809	1.99267	1.95501	1.07365	1.09258	0.96971
48	1.07506	1.093	1.25118	0.640355	0.580352	0.67334	1.3828	1.0879	1.11276
